# Supplementary material for: Lesion correlates of secondary paroxysmal dyskinesia in multiple sclerosis
Source: Springer Nature journal article supplement (doi:10.1007/s00415-018-8989-2), 2018-07-31
Supplement: MOESM1 [file 15991408]

*Table 1: Previous publications examining lesion location in MS-patients with paroxysmal dyskinesia*

| **Author** | **year** | **method** | **n** | **region identified** |
| --- | --- | --- | --- | --- |
| Watson et al. | 1979 | CT | 1 | Supratentorial white matter |
| Verheul et al. | 1990 | MRI | 1 | Cerebellar peduncle |
| Burguera et al. | 1991 | MRI | 1 | Thalamus |
| Honig et al. | 1991 | MRI | 1 | Internal capsule |
| Roos et al. | 1991 | MRI | 1 | Thalamus, Globus pallidus |
| Maimone et al. | 1991 | MRI | 1 | Internal capsule |
| Rose et al. | 1993 | MRI | 2 | Internal capsule |
| Libenson et al. | 1994 | MRI | 1 | Cerebral peduncle |
| Tranchant et al. | 1995 | MRI/CT/autopsy data | 9 (+7 reviewed cases) | Internal capsule, midbrain, thalamus, cerebellar peduncle, cervical spinal cord |
| Consentino et al. | 1996 | MRI | 1 | Spinal cord |
| Spissu et al. | 1999 | MRI | 5 | Internal capsule, cerebral peduncle |
| Fontoura et al. | 2000 | MRI | 1 | Subthalamic region |
| Yücesan et al. | 2000 | MRI | 1 | Cervical spinal cord |
| Tüzün et al. | 2001 | MRI | Unknown (subgroup), 59 with heterogenous paroxysmal events, 5 with dystonia and MRI-analysis | Internal Capsule (posterior limb), pons, centrum semiovale, corpus callosum |
| Waubant et al. | 2001 | MRI | 1 | Thalamus, internal capsule, Ncl. lentiformis |
| Zenzola et al. | 2001 | MRI | 2 | Thalamus |
| Fragoso et al. | 2006 | MRI | 2 | Thalamus, Spinal chord |
| Aguirregomozcorta et al. | 2008 | MRI | 1 | Left semi-oval center, cerebellum, pons |
| Nociti et al. | 2008 | MRI | 1 | Various, including brainstem, cerebellum, cervical spinal cord |
| Yilmaz et al. | 2011 | MRI | 1 | Various |
| Zittel et al. | 2011 | MRI | 2 | Thalamus, Mesencephalon |
| Machado et al. | 2015 | MRI | 1 | Diencephalon |
| Ciampi et al. | 2017 | MRI | 7 | Thalamus, mesencephalic tegmentum, cerebellar peduncles |
| Pop et al. | 2017 | MRI | 1 | Basal ganglia, Mesencephalon |
| Baguma et al. | 2017 | MRI | 1 | Various |

**Table legend**

**Table 1: Previous case reports and case series examining dystonic paroxysms in MS patients**

Abbreviations: n = number of patients with paroxysmal dyskinesia
